# Supplementary material
Source: PubMed Central journal article supplement (PMC5275761)
Supplement: NIHMS841677-supplement-Supplemental__Info.pdf [file NIHMS841677-supplement-Supplemental__Info.pdf]

## SUPPORTING INFORMATION

### Membrane Fluidity Modulates Thermal Stability and Ligand Binding of Cytochrome P4503A4 in Lipid Nanodiscs

This work was supported by NIH r01GM110790 (WMA) and NIH T32GM00750 (WDM)

*Wynton D. McClary, John P. Sumida, Michele Scian, Lorela Paço and William M. Atkins\**

Department of Medicinal Chemistry, Box 357610, University of Washington, Seattle, WA 98195-7610

\*Tel: 206 685-0379

email: [winky@u.washington.edu](mailto:winky@u.washington.edu)

**Table S1.** Optimal lipid:MSP1D1 ratios for mixed lipid nanodiscs.

| System    | Total Lipid:MSP1D1 |
|-----------|--------------------|
| 0% DMPC   | 65.0               |
| 20% DMPC  | 59.0               |
| 50% DMPC  | 56.5               |
| 80% DMPC  | 70.0               |
| 100% DMPC | 80.0               |

**Table S2.** Laurdan generalized polarization (G.P.) values for empty mixed lipid nanodiscs.

| System    | G.P.   |
|-----------|--------|
| 0% DMPC   | -0.055 |
| 25% DMPC  | -0.004 |
| 50% DMPC  | 0.087  |
| 75% DMPC  | 0.165  |
| 100% DMPC | 0.343  |

**Table S3.** Recovered calorimetric and van't Hoff enthalpies for deconvoluted thermograms.

| System                      | T <sub>m</sub> (°C) | ΔH <sub>cal</sub> (cal/mol) <sup>a</sup> | ΔH <sub>vH</sub> (cal/mol) <sup>b</sup> | ΔH <sub>vH</sub> /ΔH <sub>cal</sub> |
|-----------------------------|---------------------|------------------------------------------|-----------------------------------------|-------------------------------------|
| 0% DMPC                     | 49.9                | 6.6 x 10 <sup>4</sup>                    | 8.9 x 10 <sup>4</sup>                   | 1.35                                |
|                             | 53.9                | 5.8 x 10 <sup>4</sup>                    | 1.4 x 10 <sup>5</sup>                   | 2.41                                |
|                             | 56.9                | 2.7 x 10 <sup>4</sup>                    | 2.2 x 10 <sup>5</sup>                   | 8.15                                |
| 0% DMPC + KTZ <sup>c</sup>  | 51.6                | 6.6 x 10 <sup>4</sup>                    | 7.9 x 10 <sup>4</sup>                   | 1.20                                |
|                             | 56.9                | 6.3 x 10 <sup>4</sup>                    | 1.2 x 10 <sup>5</sup>                   | 1.90                                |
|                             | 60.5                | 6.5 x 10 <sup>4</sup>                    | 2.0 x 10 <sup>5</sup>                   | 3.08                                |
|                             | 62.8                | 3.0 x 10 <sup>4</sup>                    | 3.1 x 10 <sup>5</sup>                   | 10.33                               |
| 25% DMPC                    | 50.2                | 8.2 x 10 <sup>4</sup>                    | 8.7 x 10 <sup>4</sup>                   | 1.06                                |
|                             | 53.4                | 6.9 x 10 <sup>4</sup>                    | 1.3 x 10 <sup>5</sup>                   | 1.88                                |
|                             | 56.4                | 4.9 x 10 <sup>4</sup>                    | 1.7 x 10 <sup>5</sup>                   | 3.47                                |
| 25% DMPC + KTZ <sup>c</sup> | 51.6                | 6.0 x 10 <sup>4</sup>                    | 7.7 x 10 <sup>4</sup>                   | 1.28                                |
|                             | 56.7                | 6.9 x 10 <sup>4</sup>                    | 1.3 x 10 <sup>5</sup>                   | 1.88                                |
|                             | 59.9                | 6.1 x 10 <sup>4</sup>                    | 2.0 x 10 <sup>5</sup>                   | 3.28                                |
|                             | 62.0                | 2.8 x 10 <sup>4</sup>                    | 2.9 x 10 <sup>5</sup>                   | 10.36                               |
| 50% DMPC                    | 52.9                | 8.6 x 10 <sup>4</sup>                    | 8.1 x 10 <sup>4</sup>                   | 0.94                                |
|                             | 57.4                | 9.4 x 10 <sup>4</sup>                    | 1.4 x 10 <sup>5</sup>                   | 1.49                                |
|                             | 60.6                | 5.9 x 10 <sup>4</sup>                    | 2.2 x 10 <sup>5</sup>                   | 3.73                                |
| 50% DMPC + KTZ <sup>c</sup> | 51.0                | 7.5 x 10 <sup>4</sup>                    | 8.2 x 10 <sup>4</sup>                   | 1.09                                |
|                             | 56.9                | 8.4 x 10 <sup>4</sup>                    | 1.2 x 10 <sup>5</sup>                   | 1.43                                |
|                             | 60.2                | 7.0 x 10 <sup>4</sup>                    | 1.9 x 10 <sup>5</sup>                   | 2.71                                |
|                             | 62.4                | 3.5 x 10 <sup>4</sup>                    | 2.8 x 10 <sup>5</sup>                   | 8.00                                |
| 75% DMPC                    | 50.4                | 6.6 x 10 <sup>4</sup>                    | 1.1 x 10 <sup>5</sup>                   | 1.67                                |
|                             | 53.9                | 5.8 x 10 <sup>4</sup>                    | 1.6 x 10 <sup>5</sup>                   | 2.76                                |
|                             | 56.7                | 2.8 x 10 <sup>4</sup>                    | 2.2 x 10 <sup>5</sup>                   | 7.86                                |
| 75% DMPC + KTZ <sup>c</sup> | 52.1                | 3.3 x 10 <sup>4</sup>                    | 9.2 x 10 <sup>4</sup>                   | 2.79                                |
|                             | 56.6                | 5.0 x 10 <sup>4</sup>                    | 1.4 x 10 <sup>5</sup>                   | 2.80                                |
|                             | 59.8                | 4.7 x 10 <sup>4</sup>                    | 2.0 x 10 <sup>5</sup>                   | 4.26                                |
|                             | 62.0                | 2.9 x 10 <sup>4</sup>                    | 2.7 x 10 <sup>5</sup>                   | 9.31                                |

<sup>a</sup> calorimetric enthalpy<sup>b</sup> van't Hoff enthalpy<sup>c</sup> 50 μM ketoconazole

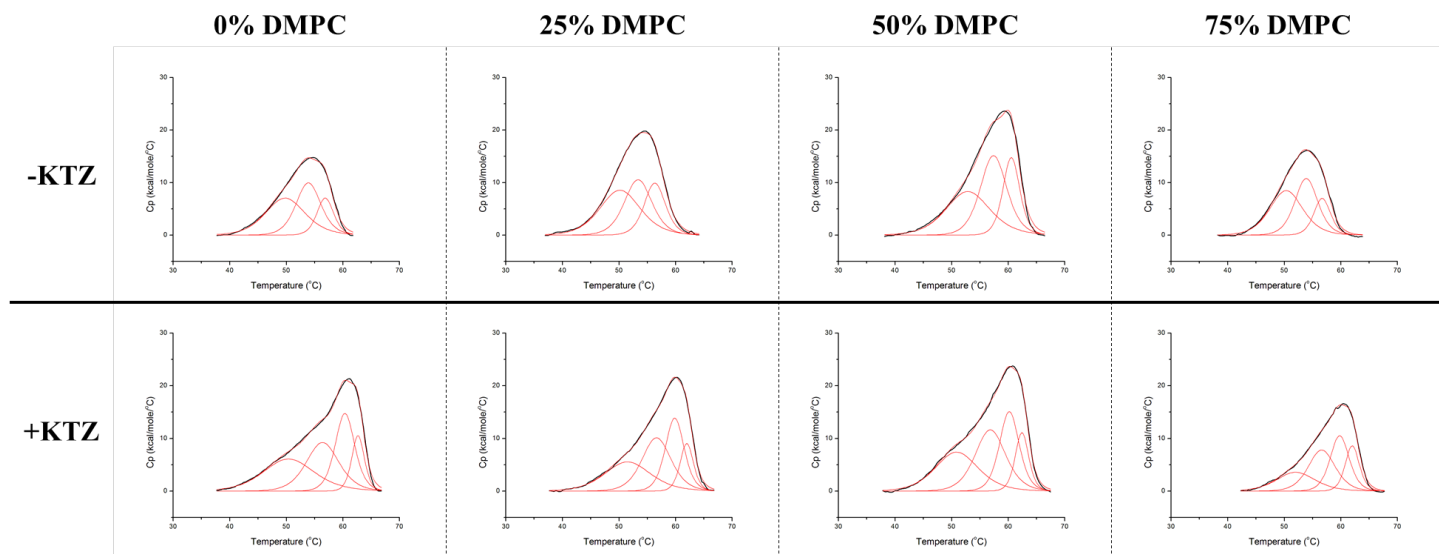

**Figure S1.** Deconvolution of CYP3A4 nanodisc thermograms containing varying lipid ratios, in the presence and absence of 5  $\mu$ M KTZ. The recovered values for the deconvolutions are summarized in Table S3.

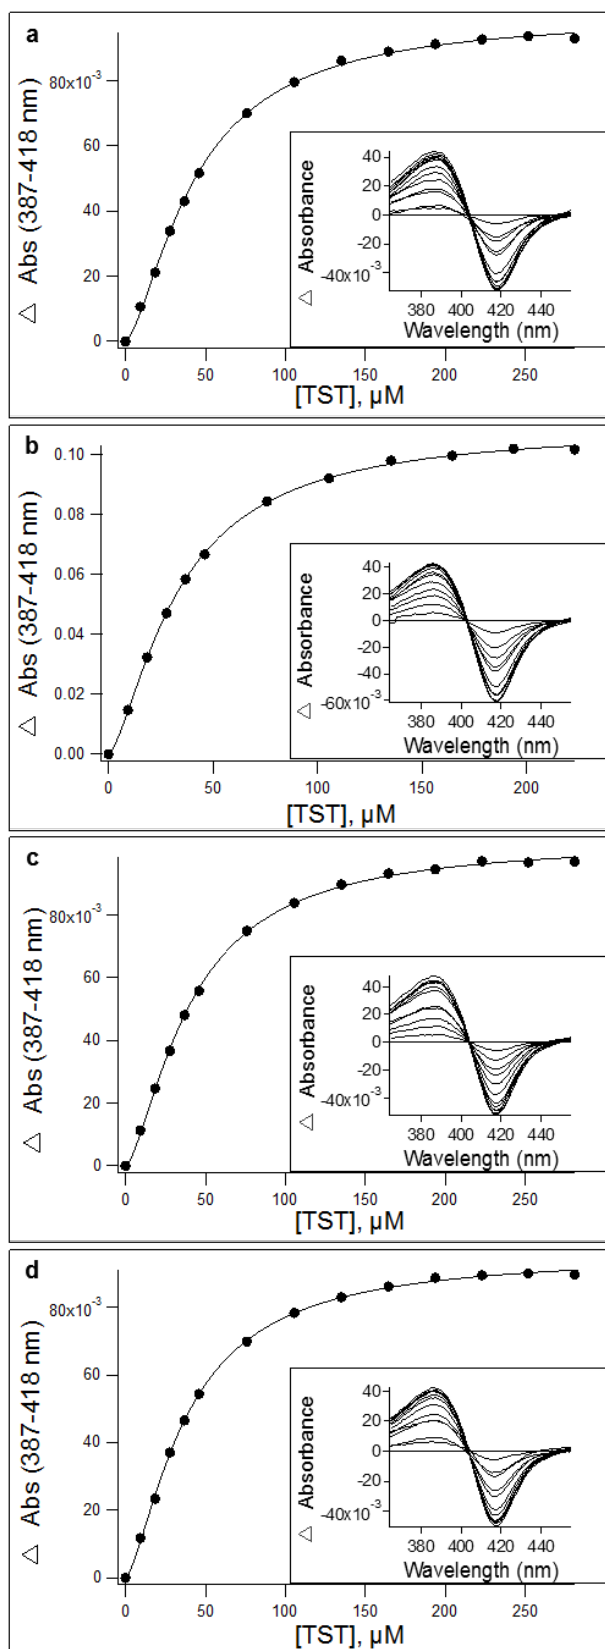

**Figure S2.** Binding isotherms for TST binding to CYP3A4 in nanodiscs composed of (a) pure POPC, (b) 3:1 POPC:DMPC (c) 1:1 POPC:DMPC, and (d) 1:3 POPC:DMPC CYP3A4 nanodiscs. *Inset:* corresponding difference absorbance spectra.

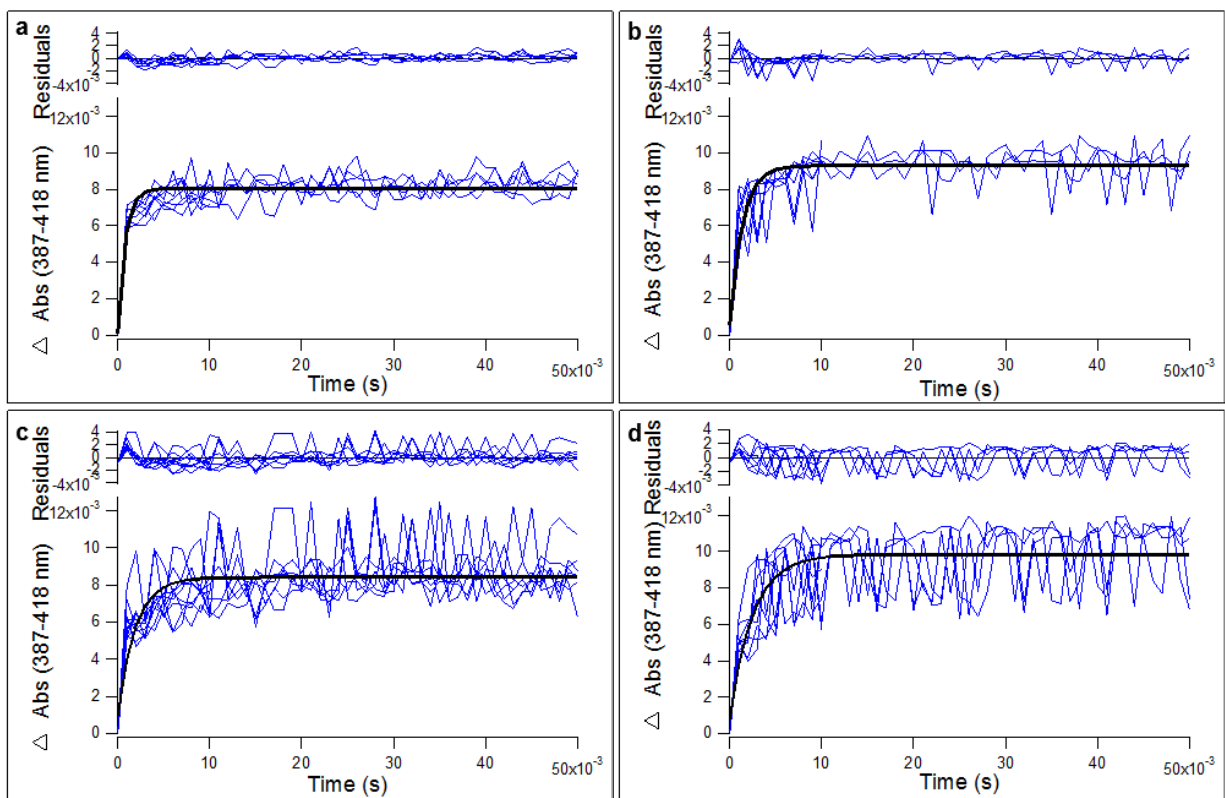

**Figure S3.** Stopped-flow kinetic analysis of TST binding to CYP3A4-nanodiscs composed of (a) pure POPC, (b) 3:1 POPC:DMPC, (c) 1:1 POPC:DMPC, and (d) 1:3 POPC:DMPC. Solid black lines is the result of fitting the kinetic data to equation 5. The saturating TST concentration was 200  $\mu\text{M}$ .
